# Supplementary material for: Divergent functionalization of aldehydes photocatalyzed by neutral eosin Y with sulfone reagents
Source: PubMed Central journal article supplement (PMC8664905; doi:10.1038/s41467-021-27550-8), 2021-12-10
Supplement: 41467_2021_27550_MOESM2_ESM.pdf [file 41467_2021_27550_MOESM2_ESM.pdf]

## Supplementary Data

### Divergent Functionalization of Aldehydes Photocatalyzed by Neutral

#### Eosin Y with Sulfone Reagents

Jianming Yan<sup>1,2,\*</sup>, Haidi Tang<sup>1,3,\*</sup>, Eugene Jun Rong Kuek<sup>1</sup>, Xiangcheng Shi<sup>1</sup>, Chenguang Liu<sup>1</sup>, Muliang Zhang<sup>1</sup>, Jared L. Piper<sup>4</sup>, Shengquan Duan<sup>4</sup> & Jie Wu<sup>1,3</sup>

<sup>1</sup>Department of Chemistry, National University of Singapore, 3 Science Drive 3, Singapore 117543, Republic of Singapore

<sup>2</sup>Department of Medicinal Chemistry, College of Pharmacy, Chongqing Medical University, Chongqing 400016, China

<sup>3</sup>National University of Singapore (Suzhou) Research Institute, 377 Lin Quan Street, Suzhou Industrial Park, Suzhou, Jiangsu, 215123, China

<sup>4</sup>Pfizer Worldwide Research and Development, Eastern Point Rd, Groton, CT 06340, USA

\*These authors contributed equally to this work.

Correspondence and requests for materials should be addressed to J.W. (email:

[chmjie@nus.edu.sg](mailto:chmjie@nus.edu.sg)),

M.Z. (email: [muliang0206@foxmail.com](mailto:muliang0206@foxmail.com)), S.D. (email: [shengquan.duan@pfizer.com](mailto:shengquan.duan@pfizer.com)).

### Table of Contents

Calculation of electrochemical potential of eosin Y-H species ..... 2

DFT calculation on SET and RHAT pathways for eosin Y regeneration.....5

## Calculation of electrochemical potential of eosin Y-H species

Density functional theory (DFT) calculations were performed to study the electrochemical potential of eosin Y-H. The calculation method was adapted from Reference.<sup>[1]</sup> The redox potential  $E_{1/2}^{o,calc}$  (vs SCE) was calculated according to the following equation:

$$E_{1/2}^{o,calc}(\text{vs SCE}) = -\frac{(G_{298}[\text{reduced}] - G_{298}[\text{oxidized}])}{n_e \mathcal{F}} - E_{1/2}^{o,SHE} - E_{1/2}^{o,SCE}$$
$$E_{1/2}^{ox}(\text{eosin Y-H}) = -0.11 \text{ V vs SCE}$$

Where  $n_e$  is the number of electrons transferred ( $n_e=1$  in our calculation),  $\mathcal{F}$  is the Faraday constant (23.061 kcal mol<sup>-1</sup> V<sup>-1</sup>).  $E_{1/2}^{o,SHE}$  is the absolute value for the standard hydrogen electrode (SHE, value = 4.281 V),  $E_{1/2}^{o,SCE}$  is the potential of the saturated calomel electrode (SCE) relative to SHE in acetonitrile (value = 0.141 V).  $G_{298}[\text{reduced}]$  and  $G_{298}[\text{oxidized}]$  (1 Hartrees = 630 kcal/mol) are the calculated Gibbs free energies with the solvation model.

### Computational Details

The geometries optimization in this study was performed at the uB3LYP/Def2SVP level of theory. The free energies of the optimized geometries were calculated at the same level of theory, considering the solvent effect using the Solvation Model Density (SMD) solvation model. All calculations were performed using the Gaussian 16 Rev. A.03 software suite.<sup>[2]</sup>

### Calculated Cartesian Coordinates

#### Structure 1. eosin Y-H

|                                                     |          |         |                      |
|-----------------------------------------------------|----------|---------|----------------------|
| Sum of electronic and zero-point Energies=          |          |         | -11438.095727        |
| Sum of electronic and thermal Energies=             |          |         | -11438.069559        |
| Sum of electronic and thermal Enthalpies=           |          |         | -11438.068615        |
| <b>Sum of electronic and thermal Free Energies=</b> |          |         | <b>-11438.158042</b> |
| C                                                   | -0.17520 | 3.19224 | -1.71564             |
| C                                                   | 0.06052  | 2.66549 | -0.43202             |
| C                                                   | 0.37347  | 3.57132 | 0.61440              |
| C                                                   | 0.46124  | 4.94799 | 0.34035              |
| C                                                   | 0.22124  | 5.44770 | -0.93731             |
| C                                                   | -0.10251 | 4.56328 | -1.97006             |
| H                                                   | -0.41092 | 2.50428 | -2.53116             |
| H                                                   | 0.71513  | 5.62171 | 1.16053              |
| H                                                   | 0.28638  | 6.52186 | -1.12685             |
| H                                                   | -0.29173 | 4.93779 | -2.97945             |
| C                                                   | 0.63191  | 3.18143 | 2.03815              |

|    |          |          |          |
|----|----------|----------|----------|
| O  | 1.16511  | 3.91048  | 2.84724  |
| O  | 0.19219  | 1.95776  | 2.36579  |
| H  | 0.41178  | 1.81158  | 3.30617  |
| C  | 0.00263  | 1.18358  | -0.27356 |
| C  | 1.20310  | 0.39772  | -0.22981 |
| C  | 2.50542  | 0.94540  | -0.30257 |
| C  | 1.10216  | -1.01617 | -0.11732 |
| C  | 3.62440  | 0.12672  | -0.25603 |
| H  | 2.62801  | 2.02370  | -0.39937 |
| C  | 2.23370  | -1.83263 | -0.07033 |
| C  | 3.52938  | -1.27507 | -0.13721 |
| C  | -1.25709 | 0.50103  | -0.21031 |
| C  | -2.51367 | 1.15398  | -0.23106 |
| C  | -1.26650 | -0.91422 | -0.09950 |
| C  | -3.70222 | 0.44144  | -0.15808 |
| H  | -2.54496 | 2.24063  | -0.30423 |
| C  | -2.46575 | -1.62350 | -0.02788 |
| C  | -3.71495 | -0.96532 | -0.05595 |
| Br | 2.05022  | -3.71462 | 0.08327  |
| O  | 4.59109  | -2.09122 | -0.08871 |
| H  | 5.40785  | -1.56455 | -0.14561 |
| Br | 5.37519  | 0.89594  | -0.35748 |
| Br | -5.36399 | 1.37303  | -0.19150 |
| O  | -4.88424 | -1.61550 | 0.01194  |
| H  | -4.72145 | -2.57312 | 0.08041  |
| O  | -0.11162 | -1.62929 | -0.05569 |
| Br | -2.45023 | -3.52395 | 0.11386  |

### Structure 2. eosin Y<sup>+</sup>-H

|                                                     |          |         |                      |
|-----------------------------------------------------|----------|---------|----------------------|
| Sum of electronic and zero-point Energies=          |          |         | -11437.939649        |
| Sum of electronic and thermal Energies=             |          |         | -11437.913967        |
| Sum of electronic and thermal Enthalpies=           |          |         | -11437.913023        |
| <b>Sum of electronic and thermal Free Energies=</b> |          |         | <b>-11438.000243</b> |
| C                                                   | -0.01505 | 3.07454 | -1.78299             |
| C                                                   | 0.02978  | 2.63590 | -0.44946             |
| C                                                   | 0.11569  | 3.59078 | 0.59151              |
| C                                                   | 0.15837  | 4.95562 | 0.26379              |
| C                                                   | 0.11367  | 5.38145 | -1.06193             |
| C                                                   | 0.02571  | 4.43712 | -2.08746             |
| H                                                   | -0.07928 | 2.33946 | -2.58827             |
| H                                                   | 0.22462  | 5.67807 | 1.07906              |
| H                                                   | 0.14615  | 6.44829 | -1.29428             |
| H                                                   | -0.01106 | 4.75590 | -3.13190             |
| C                                                   | 0.15685  | 3.25762 | 2.05036              |

|    |          |          |          |
|----|----------|----------|----------|
| O  | 0.29167  | 4.07816  | 2.92857  |
| O  | 0.01988  | 1.94584  | 2.30316  |
| H  | 0.06012  | 1.81490  | 3.27066  |
| C  | 0.00260  | 1.15690  | -0.24067 |
| C  | 1.21161  | 0.41940  | -0.19118 |
| C  | 2.49474  | 1.03111  | -0.24424 |
| C  | 1.14999  | -1.00030 | -0.08790 |
| C  | 3.62785  | 0.25926  | -0.19709 |
| H  | 2.56292  | 2.11606  | -0.32239 |
| C  | 2.30484  | -1.78676 | -0.04105 |
| C  | 3.56669  | -1.16788 | -0.09504 |
| C  | -1.22687 | 0.45647  | -0.19253 |
| C  | -2.49634 | 1.10081  | -0.23553 |
| C  | -1.19903 | -0.96327 | -0.08810 |
| C  | -3.65671 | 0.36973  | -0.17935 |
| H  | -2.53341 | 2.18728  | -0.31242 |
| C  | -2.37987 | -1.70844 | -0.03768 |
| C  | -3.62662 | -1.05887 | -0.07942 |
| Br | 2.18979  | -3.66668 | 0.08996  |
| O  | 4.64592  | -1.92780 | -0.05099 |
| H  | 5.45691  | -1.38540 | -0.09609 |
| Br | 5.35351  | 1.06112  | -0.26600 |
| Br | -5.34231 | 1.23309  | -0.22858 |
| O  | -4.77745 | -1.70301 | -0.03066 |
| H  | -4.63816 | -2.66748 | 0.03637  |
| O  | -0.03630 | -1.62995 | -0.04092 |
| Br | -2.32916 | -3.60010 | 0.08467  |

## DFT calculation on SET and RHAT pathways for eosin Y regeneration

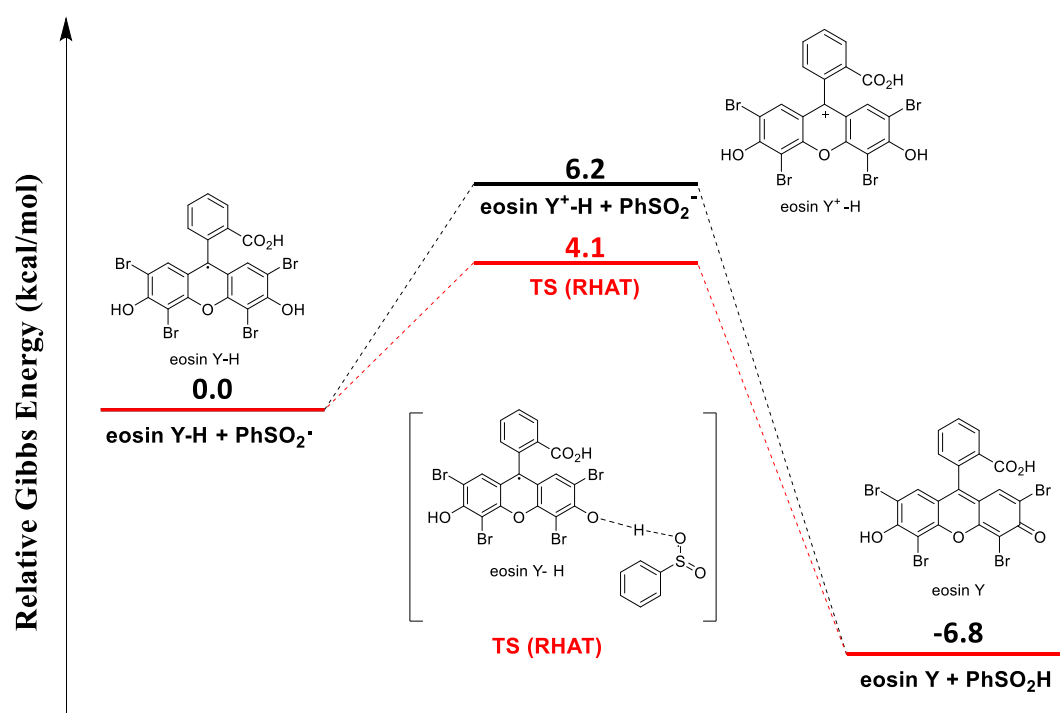

**Supplementary Figure 17.** Density functional theory (DFT) calculations on eosin Y regeneration.

### Computational details

Density functional theory (DFT) calculations were performed to shed light on the mechanism of eosin Y regeneration (Supplementary Figure 17). Reverse hydrogen atom transfer (RHAT, red line) is the favored pathway, which features a barrier 2.1 kcal/mol lower than an alternative single electron transfer (SET, black line). The geometries optimization in this study was performed at the uB3LYP density functional with a standard def2-SVP basis set. The nature of the stationary points (minima with no imaginary frequency or transition states with one imaginary frequency) were confirmed. The free energies of the optimized geometries were calculated at the same level of theory, considering the solvent effect of acetone using an SMD continuum solvation model. Unless specified otherwise, the Gibbs free energy was used throughout. For transition state, intrinsic reaction coordinate (IRC) calculations were performed to verify whether it connected with correct reactants and products or intermediates. All calculations were performed using the Gaussian 16 Rev. A.03 software suite.<sup>[2]</sup>

### Calculated Cartesian Coordinates

#### PhSO<sub>2</sub>·

Sum of electronic and zero-point Energies= -779.715038  
Sum of electronic and thermal Energies= -779.707423

Sum of electronic and thermal Enthalpies= -779.706479  
**Sum of electronic and thermal Free Energies= -779.748770**

---

|   |          |          |          |
|---|----------|----------|----------|
| C | 2.16539  | 1.21528  | 0.03415  |
| C | 0.77114  | 1.22604  | -0.05578 |
| C | 0.10036  | 0.00001  | -0.08355 |
| C | 0.77119  | -1.22602 | -0.05617 |
| C | 2.16543  | -1.21525 | 0.03372  |
| C | 2.85902  | 0.00003  | 0.07770  |
| H | 2.71022  | 2.16177  | 0.07080  |
| H | 0.21597  | 2.16501  | -0.08934 |
| H | 0.21608  | -2.16502 | -0.08994 |
| H | 2.71032  | -2.16172 | 0.06999  |
| H | 3.94986  | 0.00004  | 0.14462  |
| S | -1.70522 | -0.00011 | -0.25892 |
| O | -2.21959 | -1.29615 | 0.27148  |
| O | -2.21968 | 1.29628  | 0.27054  |

#### **Eosin Y-H**

Sum of electronic and zero-point Energies= -11438.097330  
Sum of electronic and thermal Energies= -11438.071167  
Sum of electronic and thermal Enthalpies= -11438.070223  
**Sum of electronic and thermal Free Energies= -11438.159590**

---

|   |          |          |          |
|---|----------|----------|----------|
| C | -0.17520 | 3.19224  | -1.71564 |
| C | 0.06052  | 2.66549  | -0.43202 |
| C | 0.37347  | 3.57132  | 0.61440  |
| C | 0.46124  | 4.94799  | 0.34035  |
| C | 0.22124  | 5.44770  | -0.93731 |
| C | -0.10251 | 4.56328  | -1.97006 |
| H | -0.41092 | 2.50428  | -2.53116 |
| H | 0.71513  | 5.62171  | 1.16053  |
| H | 0.28638  | 6.52186  | -1.12685 |
| H | -0.29173 | 4.93779  | -2.97945 |
| C | 0.63191  | 3.18143  | 2.03815  |
| O | 1.16511  | 3.91048  | 2.84724  |
| O | 0.19219  | 1.95776  | 2.36579  |
| H | 0.41178  | 1.81158  | 3.30617  |
| C | 0.00263  | 1.18358  | -0.27356 |
| C | 1.20310  | 0.39772  | -0.22981 |
| C | 2.50542  | 0.94540  | -0.30257 |
| C | 1.10216  | -1.01617 | -0.11732 |
| C | 3.62440  | 0.12672  | -0.25603 |
| H | 2.62801  | 2.02370  | -0.39937 |

|    |          |          |          |
|----|----------|----------|----------|
| C  | 2.23370  | -1.83263 | -0.07033 |
| C  | 3.52938  | -1.27507 | -0.13721 |
| C  | -1.25709 | 0.50103  | -0.21031 |
| C  | -2.51367 | 1.15398  | -0.23106 |
| C  | -1.26650 | -0.91422 | -0.09950 |
| C  | -3.70222 | 0.44144  | -0.15808 |
| H  | -2.54496 | 2.24063  | -0.30423 |
| C  | -2.46575 | -1.62350 | -0.02788 |
| C  | -3.71495 | -0.96532 | -0.05595 |
| Br | 2.05022  | -3.71462 | 0.08327  |
| O  | 4.59109  | -2.09122 | -0.08871 |
| H  | 5.40785  | -1.56455 | -0.14561 |
| Br | 5.37519  | 0.89594  | -0.35748 |
| Br | -5.36399 | 1.37303  | -0.19150 |
| O  | -4.88424 | -1.61550 | 0.01194  |
| H  | -4.72145 | -2.57312 | 0.08041  |
| O  | -0.11162 | -1.62929 | -0.05569 |
| Br | -2.45023 | -3.52395 | 0.11386  |

### PhSO<sub>2</sub><sup>-</sup>

|                                                     |                    |
|-----------------------------------------------------|--------------------|
| Sum of electronic and zero-point Energies=          | -779.865145        |
| Sum of electronic and thermal Energies=             | -779.857451        |
| Sum of electronic and thermal Enthalpies=           | -779.856507        |
| <b>Sum of electronic and thermal Free Energies=</b> | <b>-779.898401</b> |

---

|   |          |          |          |
|---|----------|----------|----------|
| C | 2.17417  | 1.21752  | 0.05878  |
| C | 0.77782  | 1.20715  | -0.04940 |
| C | 0.08890  | -0.00636 | -0.12330 |
| C | 0.79424  | -1.21283 | -0.08550 |
| C | 2.19044  | -1.20747 | 0.02048  |
| C | 2.88268  | 0.00913  | 0.08983  |
| H | 2.71333  | 2.16794  | 0.12492  |
| H | 0.19844  | 2.13544  | -0.05789 |
| H | 0.23186  | -2.15095 | -0.12006 |
| H | 2.74244  | -2.15211 | 0.05588  |
| H | 3.97335  | 0.01505  | 0.17309  |
| S | -1.78175 | -0.01580 | -0.35702 |
| O | -2.17439 | -1.26948 | 0.42854  |
| O | -2.17574 | 1.29382  | 0.33033  |

### Eosin Y<sup>+</sup>-H

|                                            |               |
|--------------------------------------------|---------------|
| Sum of electronic and zero-point Energies= | -11437.939381 |
| Sum of electronic and thermal Energies=    | -11437.913746 |
| Sum of electronic and thermal Enthalpies=  | -11437.912801 |

**Sum of electronic and thermal Free Energies= -11438.000015**

---

|    |          |          |          |
|----|----------|----------|----------|
| C  | -0.01505 | 3.07454  | -1.78299 |
| C  | 0.02978  | 2.63590  | -0.44946 |
| C  | 0.11569  | 3.59078  | 0.59151  |
| C  | 0.15837  | 4.95562  | 0.26379  |
| C  | 0.11367  | 5.38145  | -1.06193 |
| C  | 0.02571  | 4.43712  | -2.08746 |
| H  | -0.07928 | 2.33946  | -2.58827 |
| H  | 0.22462  | 5.67807  | 1.07906  |
| H  | 0.14615  | 6.44829  | -1.29428 |
| H  | -0.01106 | 4.75590  | -3.13190 |
| C  | 0.15685  | 3.25762  | 2.05036  |
| O  | 0.29167  | 4.07816  | 2.92857  |
| O  | 0.01988  | 1.94584  | 2.30316  |
| H  | 0.06012  | 1.81490  | 3.27066  |
| C  | 0.00260  | 1.15690  | -0.24067 |
| C  | 1.21161  | 0.41940  | -0.19118 |
| C  | 2.49474  | 1.03111  | -0.24424 |
| C  | 1.14999  | -1.00030 | -0.08790 |
| C  | 3.62785  | 0.25926  | -0.19709 |
| H  | 2.56292  | 2.11606  | -0.32239 |
| C  | 2.30484  | -1.78676 | -0.04105 |
| C  | 3.56669  | -1.16788 | -0.09504 |
| C  | -1.22687 | 0.45647  | -0.19253 |
| C  | -2.49634 | 1.10081  | -0.23553 |
| C  | -1.19903 | -0.96327 | -0.08810 |
| C  | -3.65671 | 0.36973  | -0.17935 |
| H  | -2.53341 | 2.18728  | -0.31242 |
| C  | -2.37987 | -1.70844 | -0.03768 |
| C  | -3.62662 | -1.05887 | -0.07942 |
| Br | 2.18979  | -3.66668 | 0.08996  |
| O  | 4.64592  | -1.92780 | -0.05099 |
| H  | 5.45691  | -1.38540 | -0.09609 |
| Br | 5.35351  | 1.06112  | -0.26600 |
| Br | -5.34231 | 1.23309  | -0.22858 |
| O  | -4.77745 | -1.70301 | -0.03066 |
| H  | -4.63816 | -2.66748 | 0.03637  |
| O  | -0.03630 | -1.62995 | -0.04092 |
| Br | -2.32916 | -3.60010 | 0.08467  |

**TS (HAT)**

Sum of electronic and zero-point Energies= -12217.824902  
Sum of electronic and thermal Energies= -12217.790042



Sum of electronic and thermal Enthalpies= -12217.789098  
**Sum of electronic and thermal Free Energies= -12217.901894**

---

|    |          |          |          |
|----|----------|----------|----------|
| C  | 2.86194  | 3.16522  | -1.63468 |
| C  | 2.46652  | 2.68693  | -0.37482 |
| C  | 2.57160  | 3.54137  | 0.74945  |
| C  | 3.06011  | 4.84678  | 0.57342  |
| C  | 3.44894  | 5.31026  | -0.68131 |
| C  | 3.35008  | 4.46467  | -1.78888 |
| H  | 2.78152  | 2.50910  | -2.50429 |
| H  | 3.12884  | 5.49160  | 1.45106  |
| H  | 3.82797  | 6.32854  | -0.79460 |
| H  | 3.65067  | 4.81297  | -2.78009 |
| C  | 2.19507  | 3.16380  | 2.14881  |
| O  | 2.20261  | 3.93543  | 3.08123  |
| O  | 1.85433  | 1.87330  | 2.28544  |
| H  | 1.61886  | 1.71847  | 3.22090  |
| C  | 1.94470  | 1.28622  | -0.33110 |
| C  | 2.84869  | 0.19245  | -0.18289 |
| C  | 4.24219  | 0.36006  | 0.01866  |
| C  | 2.33363  | -1.13006 | -0.23256 |
| C  | 5.05963  | -0.73769 | 0.15433  |
| H  | 4.65432  | 1.36772  | 0.06577  |
| C  | 3.16790  | -2.24682 | -0.10172 |
| C  | 4.54849  | -2.06864 | 0.09433  |
| C  | 0.58064  | 1.01974  | -0.52626 |
| C  | -0.40258 | 2.04220  | -0.70418 |
| C  | 0.13423  | -0.34230 | -0.54737 |
| C  | -1.72071 | 1.72007  | -0.86919 |
| H  | -0.08353 | 3.08401  | -0.69859 |
| C  | -1.20470 | -0.66934 | -0.72388 |
| C  | -2.19156 | 0.34808  | -0.88305 |
| Br | 2.45601  | -3.99550 | -0.18247 |
| O  | 5.31792  | -3.14170 | 0.21523  |
| H  | 6.24888  | -2.88173 | 0.34796  |
| Br | 6.93495  | -0.52258 | 0.43158  |
| Br | -3.01702 | 3.08881  | -1.08720 |
| O  | -3.44200 | 0.10766  | -1.06164 |
| O  | 1.01857  | -1.34905 | -0.40727 |
| Br | -1.73871 | -2.48401 | -0.80917 |
| H  | -3.95987 | -0.66663 | -0.38595 |
| C  | -6.54701 | -0.69749 | 0.74723  |
| C  | -7.54118 | -1.31003 | -0.02075 |
| C  | -6.79058 | 0.51151  | 1.40518  |

|   |           |          |          |
|---|-----------|----------|----------|
| C | -8.79762  | -0.70405 | -0.12910 |
| H | -7.32737  | -2.26117 | -0.51421 |
| C | -8.04829  | 1.11389  | 1.29326  |
| H | -5.99954  | 0.96367  | 2.00820  |
| C | -9.05035  | 0.50759  | 0.52563  |
| H | -9.58316  | -1.18017 | -0.72272 |
| H | -8.24910  | 2.05686  | 1.80966  |
| H | -10.03267 | 0.98001  | 0.43924  |
| O | -4.33637  | -1.03405 | 2.17975  |
| O | -5.11507  | -2.92691 | 0.63179  |
| S | -4.87671  | -1.45765 | 0.84026  |

### PhSO<sub>2</sub>H

|                                                     |                    |
|-----------------------------------------------------|--------------------|
| Sum of electronic and zero-point Energies=          | -780.311851        |
| Sum of electronic and thermal Energies=             | -780.304312        |
| Sum of electronic and thermal Enthalpies=           | -780.303368        |
| <b>Sum of electronic and thermal Free Energies=</b> | <b>-780.345025</b> |

---

|   |          |          |          |
|---|----------|----------|----------|
| C | -2.18685 | 1.21526  | -0.03283 |
| C | -0.79181 | 1.22316  | 0.04602  |
| C | -0.11461 | -0.00001 | 0.08600  |
| C | -0.79185 | -1.22316 | 0.04616  |
| C | -2.18689 | -1.21523 | -0.03269 |
| C | -2.88063 | 0.00002  | -0.07051 |
| H | -2.73293 | 2.16114  | -0.06818 |
| H | -0.23506 | 2.16196  | 0.06816  |
| H | -0.23514 | -2.16199 | 0.06837  |
| H | -2.73299 | -2.16111 | -0.06792 |
| H | -3.97196 | 0.00003  | -0.13271 |
| O | 2.18528  | -1.27852 | -0.31195 |
| O | 2.18530  | 1.27859  | -0.31159 |
| S | 1.67458  | -0.00003 | 0.20576  |
| H | 1.86595  | -0.00023 | 1.57547  |

### Eosin Y

|                                                     |                      |
|-----------------------------------------------------|----------------------|
| Sum of electronic and zero-point Energies=          | -11437.512694        |
| Sum of electronic and thermal Energies=             | -11437.487032        |
| Sum of electronic and thermal Enthalpies=           | -11437.486087        |
| <b>Sum of electronic and thermal Free Energies=</b> | <b>-11437.574106</b> |

---

|   |          |         |          |
|---|----------|---------|----------|
| C | -0.15096 | 3.08714 | -1.75740 |
| C | -0.04019 | 2.62192 | -0.43605 |
| C | 0.10157  | 3.56726 | 0.60990  |

|    |          |          |          |
|----|----------|----------|----------|
| C  | 0.12350  | 4.93792  | 0.29800  |
| C  | 0.01133  | 5.38390  | -1.01659 |
| C  | -0.12630 | 4.45262  | -2.04887 |
| H  | -0.25701 | 2.36265  | -2.56806 |
| H  | 0.22964  | 5.64897  | 1.11890  |
| H  | 0.03030  | 6.45423  | -1.23482 |
| H  | -0.21584 | 4.78493  | -3.08613 |
| C  | 0.22920  | 3.23103  | 2.06440  |
| O  | 0.38395  | 4.05919  | 2.93489  |
| O  | 0.15490  | 1.91913  | 2.33209  |
| H  | 0.25172  | 1.80599  | 3.29745  |
| C  | -0.06080 | 1.13688  | -0.24820 |
| C  | 1.18478  | 0.40925  | -0.20673 |
| C  | 2.45044  | 1.03093  | -0.27103 |
| C  | 1.13868  | -1.00082 | -0.09900 |
| C  | 3.60401  | 0.27263  | -0.22456 |
| H  | 2.51070  | 2.11551  | -0.35888 |
| C  | 2.31022  | -1.76817 | -0.05328 |
| C  | 3.56811  | -1.14185 | -0.11422 |
| C  | -1.25485 | 0.43521  | -0.19928 |
| C  | -2.54773 | 1.07161  | -0.23793 |
| C  | -1.23025 | -1.00885 | -0.08849 |
| C  | -3.69045 | 0.34215  | -0.17865 |
| H  | -2.58636 | 2.15814  | -0.31493 |
| C  | -2.38376 | -1.75020 | -0.03106 |
| C  | -3.71791 | -1.14018 | -0.07135 |
| Br | 2.21711  | -3.65307 | 0.08894  |
| O  | 4.66459  | -1.89690 | -0.06861 |
| H  | 5.45925  | -1.33493 | -0.12012 |
| Br | 5.31790  | 1.11472  | -0.30888 |
| Br | -5.38453 | 1.20148  | -0.22917 |
| O  | -4.75967 | -1.78304 | -0.02097 |
| O  | -0.03819 | -1.65531 | -0.04116 |
| Br | -2.31559 | -3.63919 | 0.10738  |

## References:

1. Roth, H. G., Romero, N. A., Nicewicz, D. A. Experimental and calculated electrochemical potentials of common organic molecules for applications to single-electron redox chemistry. *Synlett*, **27**: 714-723. (2016)
2. Gaussian 16, Revision A.03, Frisch, M. J., Trucks, G. W., Schlegel, H. B., Scuseria, G. E., Robb, M. A., Cheeseman, Scalmani, J. R., Barone, G. V., Petersson, G. A., Nakatsuji, H., Li, X., Caricato, M., Marenich, A. V., Bloino, J. B., Janesko, G., Gomperts, R., Mennucci, B. H., Hratchian, P., Ortiz, J. V., Izmaylov, A. F., Sonnenberg, J. L., Williams-Young, D., Ding, F., Lipparini, F., Egidi, F., Peng, J. B., Petrone, A., Henderson, T., Zakrzewski, D. V. G., Gao, J., Rega, N., Zheng, G., Liang, W., Hada, M., Ehara, M., Toyota, K., Fukuda, R., Hasegawa, J., Ishida, M., Nakajima, T., Honda, Y., Kitao, O., Nakai, H., Vreven, T., Throssell, K., Montgomery, J. A. Jr., Peralta, J. E., Ogliaro, F., Bearpark, M. J., Heyd, J. J., Brothers, E. N., Kudin, K. N., Staroverov, V. N., Keith, T. A., Normand, R. J., Raghavachari, K. A., Rendell, P., Burant, J. C., Iyengar, S. S., Tomasi, J., Cossi, M., Millam, J. M., Klene, M., Adamo, C., Cammi, R., Ochterski, J. W., Martin, R. L., Morokuma, K., Farkas, O., Foresman, J. B. & Fox, D. J. Gaussian, Inc., Wallingford CT, (2006).
